# Supplementary material for: Upregulation of Mir342 in Diet-Induced Obesity Mouse and the Hypothalamic Appetite Control
Source: Front Endocrinol (Lausanne). 2021 Aug 30;12:727915. doi: 10.3389/fendo.2021.727915 (PMC8437242; doi:10.3389/fendo.2021.727915)
Supplement: Supplementary file 1 [file DataSheet_1.xlsx]

## Sheet: Results
Supplementary Data.
	Assay ID	ASY3416		ASY3417		ASY3418			ASY3391					ASY3395																			ASY3396													ASY3398
	From ATG	-2429		-2233		-2020	-2014		-1091	-1034	-1016	-995		-193	-187	-184	-181	-178	-175	-173	-169	-167	-159	-150	-145	-141	-137	-134	-117	-114	-111		12	20	24	29	41	45	48	66	73	78	97	100		313	362	364
	From TSS	-1944		-1748		-1535	-1529		-606	-549	-531	-510		293	299	302	305	308	311	313	317	319	327	336	341	345	349	352	369	372	375		497	505	509	514	526	530	533	551	558	563	582	585		798	847	849
	GRCm39	Chr12:108519039		Chr12:108519235		Chr12:108519448	Chr12:108519454		Chr12:108520377	Chr12:108520434	Chr12:108520452	Chr12:108520473		Chr12:108521275	Chr12:108521281	Chr12:108521284	Chr12:108521287	Chr12:108521290	Chr12:108521293	Chr12:108521295	Chr12:108521299	Chr12:108521301	Chr12:108521309	Chr12:108521318	Chr12:108521323	Chr12:108521327	Chr12:108521331	Chr12:108521334	Chr12:108521351	Chr12:108521354	Chr12:108521357		Chr12:108521479	Chr12:108521487	Chr12:108521491	Chr12:108521496	Chr12:108521508	Chr12:108521512	Chr12:108521515	Chr12:108521533	Chr12:108521540	Chr12:108521545	Chr12:108521564	Chr12:108521567		Chr12:108521780	Chr12:108521829	Chr12:108521831
	Location	5-Upstream		5-Upstream		5-Upstream	5-Upstream		5-Upstream	5-Upstream	5-Upstream	5-Upstream		5-UTR	5-UTR	5-UTR	5-UTR	5-UTR	5-UTR	5-UTR	5-UTR	5-UTR	5-UTR	5-UTR	5-UTR	5-UTR	5-UTR	5-UTR	5-UTR	5-UTR	5-UTR		Intron 1	Intron 1	Intron 1	Intron 1	Intron 1	Intron 1	Intron 1	Intron 1	Intron 1	Intron 1	Intron 1	Intron 1		Intron 1	Intron 1	Intron 1
	FASTA ID	Evl.3057		Evl.3253		Evl.3466	Evl.3472		Evl.4395	Evl.4452	Evl.4470	Evl.4491		Evl.5293	Evl.5299	Evl.5302	Evl.5305	Evl.5308	Evl.5311	Evl.5313	Evl.5317	Evl.5319	Evl.5327	Evl.5336	Evl.5341	Evl.5345	Evl.5349	Evl.5352	Evl.5369	Evl.5372	Evl.5375		Evl.5497	Evl.5505	Evl.5509	Evl.5514	Evl.5526	Evl.5530	Evl.5533	Evl.5551	Evl.5558	Evl.5563	Evl.5582	Evl.5585		Evl.5798	Evl.5847	Evl.5849
	Sample ID	CpG#-137 cg31108495		CpG#-131 cg31108501		CpG#-129	CpG#-128		CpG#-121	CpG#-120 cg31108512	CpG#-119 cg31108513	CpG#-118		CpG#-37	CpG#-36	CpG#-35	CpG#-34	CpG#-33	CpG#-32	CpG#-31	CpG#-30	CpG#-29	CpG#-28	CpG#-27	CpG#-26	CpG#-25	CpG#-24	CpG#-23	CpG#-22	CpG#-21	CpG#-20		CpG#1	CpG#2	CpG#3	CpG#4	CpG#5	CpG#6	CpG#7	CpG#8	CpG#9	CpG#10	CpG#11	CpG#12		CpG#33	CpG#34	CpG#35
	HFHS Mir342 (+/+) 1	69.9764		73.1959		59.3548	50		6.21469	2.14286	5.46875	31.8584		0.534759	0.180832	0.178891	0.180832	0.367647	0.369004	15.0278	0.56391	5.86011	0.567108	0.94518	5.33333	0.561798	15.6716	0.185529	0.186567	0	0		0.33557	0.318471	12.3839	0	0.593472	0	0	0	0.306748	0	0.296736	0		0	0.900901	0
	HFHS Mir342 (+/+) 2	77.1005				53.3333			11.1111	3.63636	1.81818	48		0	0	0.456621	0	0	0	0	0.473934	0	0	0.462963	0	0.45045	0.45045	0	0	0	0		0	0	0	0	0	0	0	0	0	2.12766	4.16667	0		0	3.125	0
	HFHS Mir342 (+/+) 3	70.0272				42	38		13.5135	3.7037	3.92157	47.5		0.328947	0	0	0.327869	0	0	0	0.352113	0.34965	0	0	0	0.33557	0.331126	0	0	0.696864	0.352113		1.20482	0	1.13636	0	0	0	0	3.94737	0	1.28205	2.66667	3.94737		0	2.38095	0
	STD Mir342 (+/+) 1	82.3612		88.1579		84.7458	70.2479		3.01205	2.17391	3.14961	7.76699		0.431034	0.218341	0	0	0.223714	0.221729	0	0	0.229885	0.223714	0.451467	0	0	0.447427	0.226757	0.231481	0	0		0	0	0.609756	0	0	0	0	0.684932	0.662252	0	0	0		0	0	0
	STD Mir342 (+/+) 2	63.8498		70.2703		63.6364	50		1.17647	3.27869	3.27869	28.8462		0.149701	0	0.89955	0.906344	0.306279	0.462963	0	0.626959	0.15528	0.457317	0.149031	0.294118	0.293255	0.58309	0	0.294551	0.295421	0		0	0	3.9604	0.980392	0	0	1	0	0	0	0	0		0	8	0
	STD Mir342 (+/+) 3	83.0882		67.4419		61.194	50		4.12371	6.25	0	30.303		0.340136	0	0	0	0	1.05634	0	0	0	0	0.341297	0	0	0.332226	0.664452	0	0	0.334448		1.04167	0	0	0	0	0	1	0	1.0101	0	0.980392	0		0	1.92308	0
	RSQ	0.971588		0.951095		0.993621	0.993685		0.990433	0.988817	0.991303	0.981041		0.772355	0.974385	0.900466	0.83272	0.0333824	0.683989	0.923404	0.930874	0.999302	0.76751	0.922866	0.902793	0.476731	0.919679	0.907437	0.679055	0.840993	0.902587		0.949562	0.95168	0.953084	0.954657	0.96697	0.967885	0.966609	0.966003	0.93222	0.957152	0.943447	0.956566		0.952598	0.961118	0.963606
Ensembl Regulatory Build / UCSC Genome Browser									Promoter: ENSMUSR00000066359
														CpG island
p-values	by CpG	0.684984		-		0.0527803	0.159409		0.0736473	0.501637	0.423152	0.0102079		0.819124	0.42265	0.680876	0.765888	0.723031	0.318707	0.42265	0.354269	0.404092	0.884989	0.602495	0.455317	0.0953213	0.427743	0.388003	0.342216	0.693785	0.42265		0.228318	0.42265	0.585758	0.42265	0.42265	-	0.183503	0.529854	0.263722	0.20751	0.211826	0.42265		-	0.59224	-
	by assay	0.684984		-		0.00331008			0.0175126					0.0784712																			0.124728													0.512623
Statistic	Group	CpG#-137		CpG#-131		CpG#-129	CpG#-128		CpG#-121	CpG#-120	CpG#-119	CpG#-118		CpG#-37	CpG#-36	CpG#-35	CpG#-34	CpG#-33	CpG#-32	CpG#-31	CpG#-30	CpG#-29	CpG#-28	CpG#-27	CpG#-26	CpG#-25	CpG#-24	CpG#-23	CpG#-22	CpG#-21	CpG#-20		CpG#1	CpG#2	CpG#3	CpG#4	CpG#5	CpG#6	CpG#7	CpG#8	CpG#9	CpG#10	CpG#11	CpG#12		CpG#33	CpG#34	CpG#35
Average % Methylation	HFHS Mir342 (+/+)	72.368		73.1959		51.5627	44		10.2798	3.16097	3.73617	42.4528		0.287902	0.0602773	0.211837	0.169567	0.122549	0.123001	5.00928	0.463319	2.06992	0.189036	0.469381	1.77778	0.449273	5.48441	0.0618429	0.0621891	0.232288	0.117371		0.513463	0.106157	4.50675	0	0.197824	0	0	1.31579	0.102249	1.13657	2.37669	1.31579		0	2.13562	0
	STD Mir342 (+/+)	76.4331		75.29		69.8587	56.7493		2.77074	3.90087	2.14276	22.3054		0.306957	0.0727802	0.29985	0.302115	0.176664	0.580343	0	0.208986	0.128388	0.22701	0.313932	0.0980392	0.0977517	0.454248	0.29707	0.175344	0.0984737	0.111483		0.347222	0	1.52338	0.326797	0	0	0.666667	0.228311	0.557451	0	0.326797	0		0	3.30769	0
Standard Deviation	HFHS Mir342 (+/+)	3.34642		0		7.19485	6		3.03716	0.720443	1.49609	7.49415		0.220235	0.0852449	0.187865	0.134089	0.17331	0.17395	7.08419	0.086791	2.68387	0.267337	0.385895	2.51416	0.0923607	7.20363	0.0874591	0.0879486	0.328505	0.165988		0.507695	0.150129	5.58927	0	0.279765	0	0	1.86081	0.144603	0.874684	1.59314	1.86081		0	0.924408	0
	STD Mir342 (+/+)	8.90269		9.17194		10.5738	9.54497		1.21524	1.72123	1.51608	10.2974		0.117226	0.102927	0.424052	0.427255	0.129388	0.350691	0	0.295551	0.0957571	0.186713	0.124976	0.138648	0.138242	0.102528	0.27578	0.126632	0.139263	0.15766		0.491046	0	1.74111	0.462161	0	0	0.471405	0.32288	0.418978	0	0.462161	0		0	3.40958	0
ΔMeth (HFHS - STD)		-4.06504		-2.09413		-18.296	-12.7493		7.50903	-0.739892	1.5934	20.1474		-0.0190548	-0.0125029	-0.0880128	-0.132548	-0.0541151	-0.457342	5.00928	0.254332	1.94153	-0.0379743	0.155449	1.67974	0.351521	5.03016	-0.235227	-0.113155	0.133814	0.00588817		0.166241	0.106157	2.98337	-0.326797	0.197824	0	-0.666667	1.08748	-0.455201	1.13657	2.04989	1.31579		0	-1.17207	0
% Methylation: HFHS vs STD
% Methylation: Individual Samples
[truncated: 62 more columns]

## Sheet: Summary
Gene	Assay	Size	# of CpGs	RSQ	Sample Average Reads	Mixing Average Reads	Note
Evl	ASY3416	67	1	0.972	995	700
	ASY3417	77	1	0.951	63	58
	ASY3418	96	2	0.994	84	98	15% demethylation in HFD (2kb upstream)
	ASY3391	225	4	0.988	88	118	CpG#-118 20% higher meth in HFD at 1st promoter
	ASY3395	138	18	0.798	409	282	all samples demethylated throughout CpG island
	ASY3396	141	12	0.955	135	153
	ASY3398	143	3	0.959	72	65
	ASY3399	123	3	0.997	1512	1133
	ASY3400	120	2	0.987	111	80
	ASY3401	142	3	0.976	283	216
	ASY3402	137	3	0.973	84	60	higher meth in HFD throughout 2nd promoter (after Alt TSS)
	ASY3403	97	2	0.986	933	710
	ASY3404	204	3	0.981	350	357
	ASY3405	217	6	0.988	191	158	5% higher meth in HFD at CpG#466
	ASY3419	185	5	0.988	75	79	10% higher meth in HFD except CpG#566
	ASY3407	200	4	0.989	153	141	higher meth in HFD throughout this enhancer
	ASY3408	111	2	0.992	498	376
	ASY3409	184	3	0.986	112	92
	ASY3411	89	1	0.845	123	89
	ASY3420	105	2	0.953	1643	1014	no change in methylation at 3rd promoter
	ASY3410	113	2	0.98	374	279
	ASY3422	135	1	-	204	-
	ASY3423	70	1	0.972	222	186
	ASY3412	100	1	0.995	93	87
	ASY3425	203	5	0.973	97	54	slightly increased meth in HFD immediately upstream Mir342
	ASY3426	194	4	0.943	379	289	slight demethylation in HFD at CpG#984
	ASY3413	98	2	0.939	294	218
	ASY3427	138	2	-	101	-	15% higher meth in HFD (intron 11)
	ASY3414	114	5	0.9	566	324
